# Supplementary material for: Associations with photoreceptor thickness measures in the UK Biobank
Source: PubMed Central journal article supplement (PMC6923366; doi:10.1038/s41598-019-55484-1), 2019-12-19
Supplement: 41598_2019_55484_MOESM1_ESM.pdf [file 41598_2019_55484_MOESM1_ESM.pdf]

## **Associations with photoreceptor thickness measures in the UK Biobank**

Sharon Y.L. Chua PhD<sup>1</sup>; Baljean Dhillon FRCS(Ed) FRCOphth<sup>2,3</sup>; Tariq Aslam FRCSEd.(Ophth), PhD<sup>4,5</sup>; Konstantinos Balaskas FRCOphth<sup>1,6</sup>; Qi Yang PhD<sup>7</sup>; Pearse A. Keane MD<sup>1</sup>; Adnan Tufail FRCOphth<sup>1</sup>; Charles Reisman MSc<sup>7</sup>; Paul J. Foster PhD<sup>1+</sup>; Praveen J. Patel FRCOphth<sup>1+\*</sup> on behalf of the UK Biobank Eye and Vision Consortium,

<sup>+</sup>These authors take joint credit for this manuscript

### **Author affiliations:**

<sup>1</sup> NIHR Biomedical Research Centre, Moorfields Eye Hospital NHS Foundation Trust and UCL Institute of Ophthalmology, London, United Kingdom

<sup>2</sup> Centre for Clinical Brain Sciences, School of Clinical Sciences, University of Edinburgh, Edinburgh, UK

<sup>3</sup> NHS Lothian Princess Alexandra Eye Pavilion, Edinburgh, UK

<sup>4</sup> Faculty of Biology, Medicine and Health, School of Pharmacy and Optometry, The University of Manchester, Manchester, UK

<sup>5</sup> Manchester Royal Eye Hospital, NHS Central Manchester University Hospitals, Manchester, United Kingdom

<sup>6</sup> School of Biological Sciences, University of Manchester, Manchester, UK

<sup>7</sup> Topcon Advanced Biomedical Imaging Laboratory, Oakland, New Jersey, United States of America

**Corresponding author: Praveen J. Patel**

**Address: NIHR Biomedical Research Centre, Moorfields Eye Hospital NHS Foundation Trust, 162 City Road, London, EC1V 2PD**

**Email: Praveen.Patel1@nhs.net**

**Telephone:**

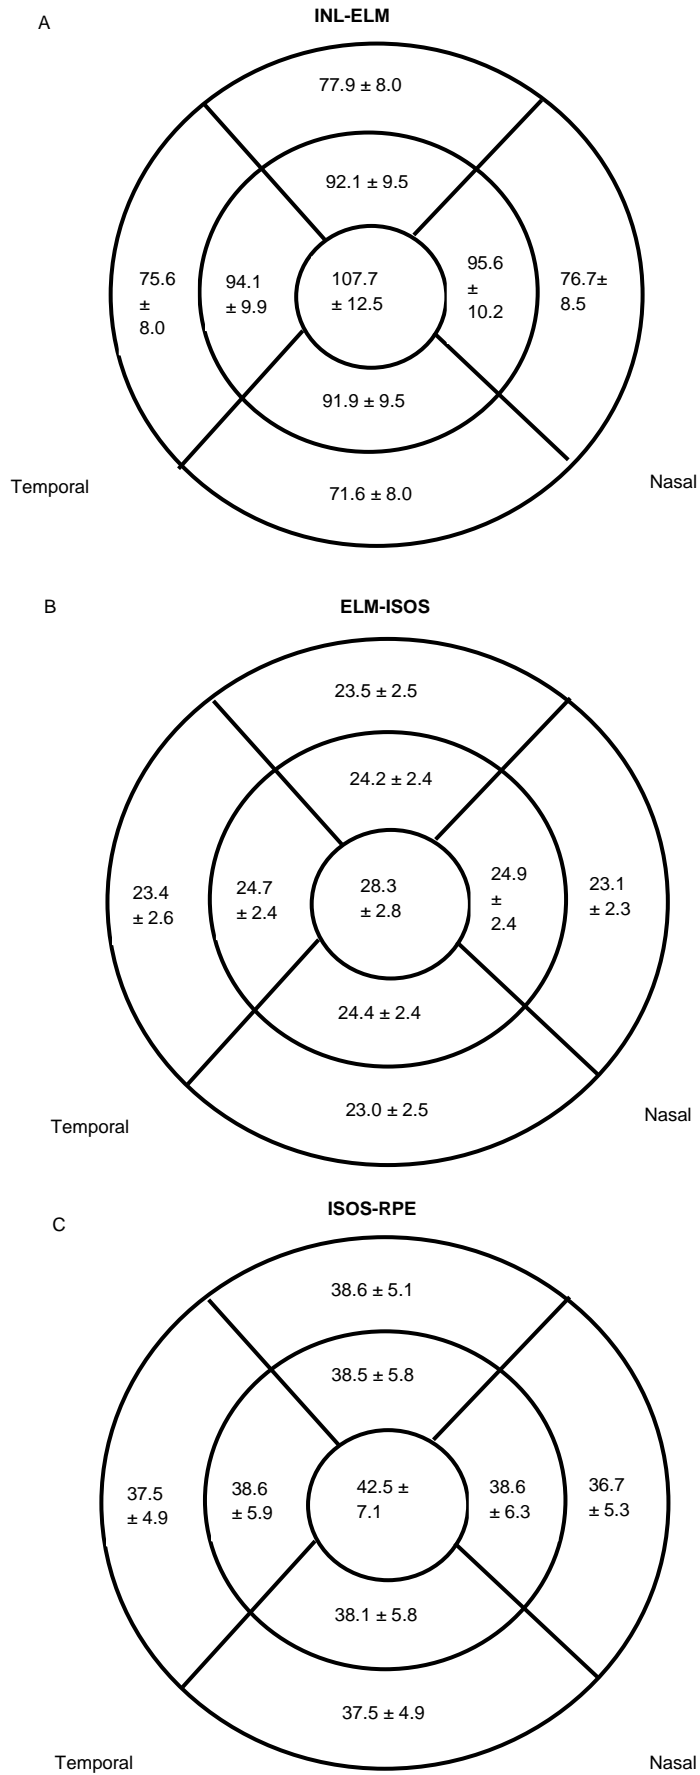

Figure S1. Diagrams showing Inner nuclear layer- External limiting membrane (INL-ELM) thickness ( $\mu\text{m}$ ) (A), External limiting membrane-Inner and outer segments (ELM-ISOS) thickness ( $\mu\text{m}$ ) (B) and Inner and outer segments-Retinal pigment epithelium thickness (ISOS-RPE) thickness ( $\mu\text{m}$ ) (C) at the central, inner and outer subfields across the 4 sectors

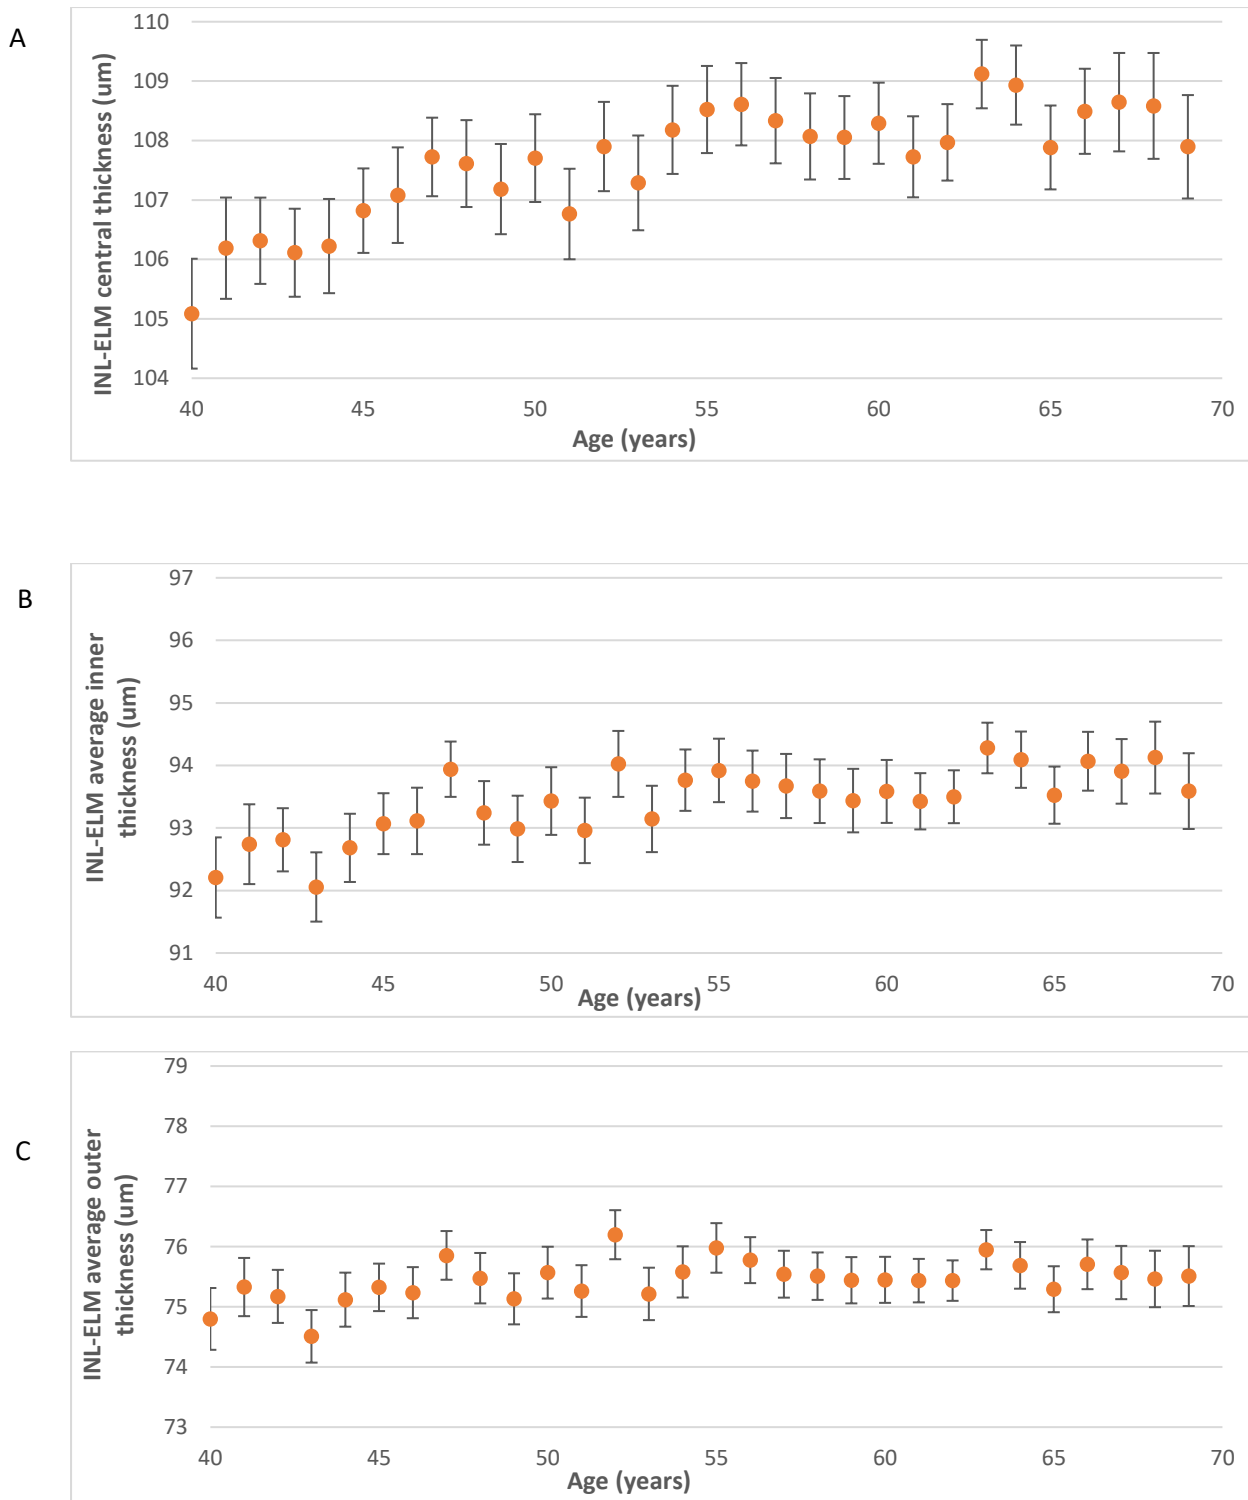

Figure S2. Graphs showing the mean Inner nuclear layer- External limiting membrane (INL-ELM) thickness(µm) in the (A) central, (B) average inner, and (C) average outer subfields by age. Error bars indicate 95% confidence interval.

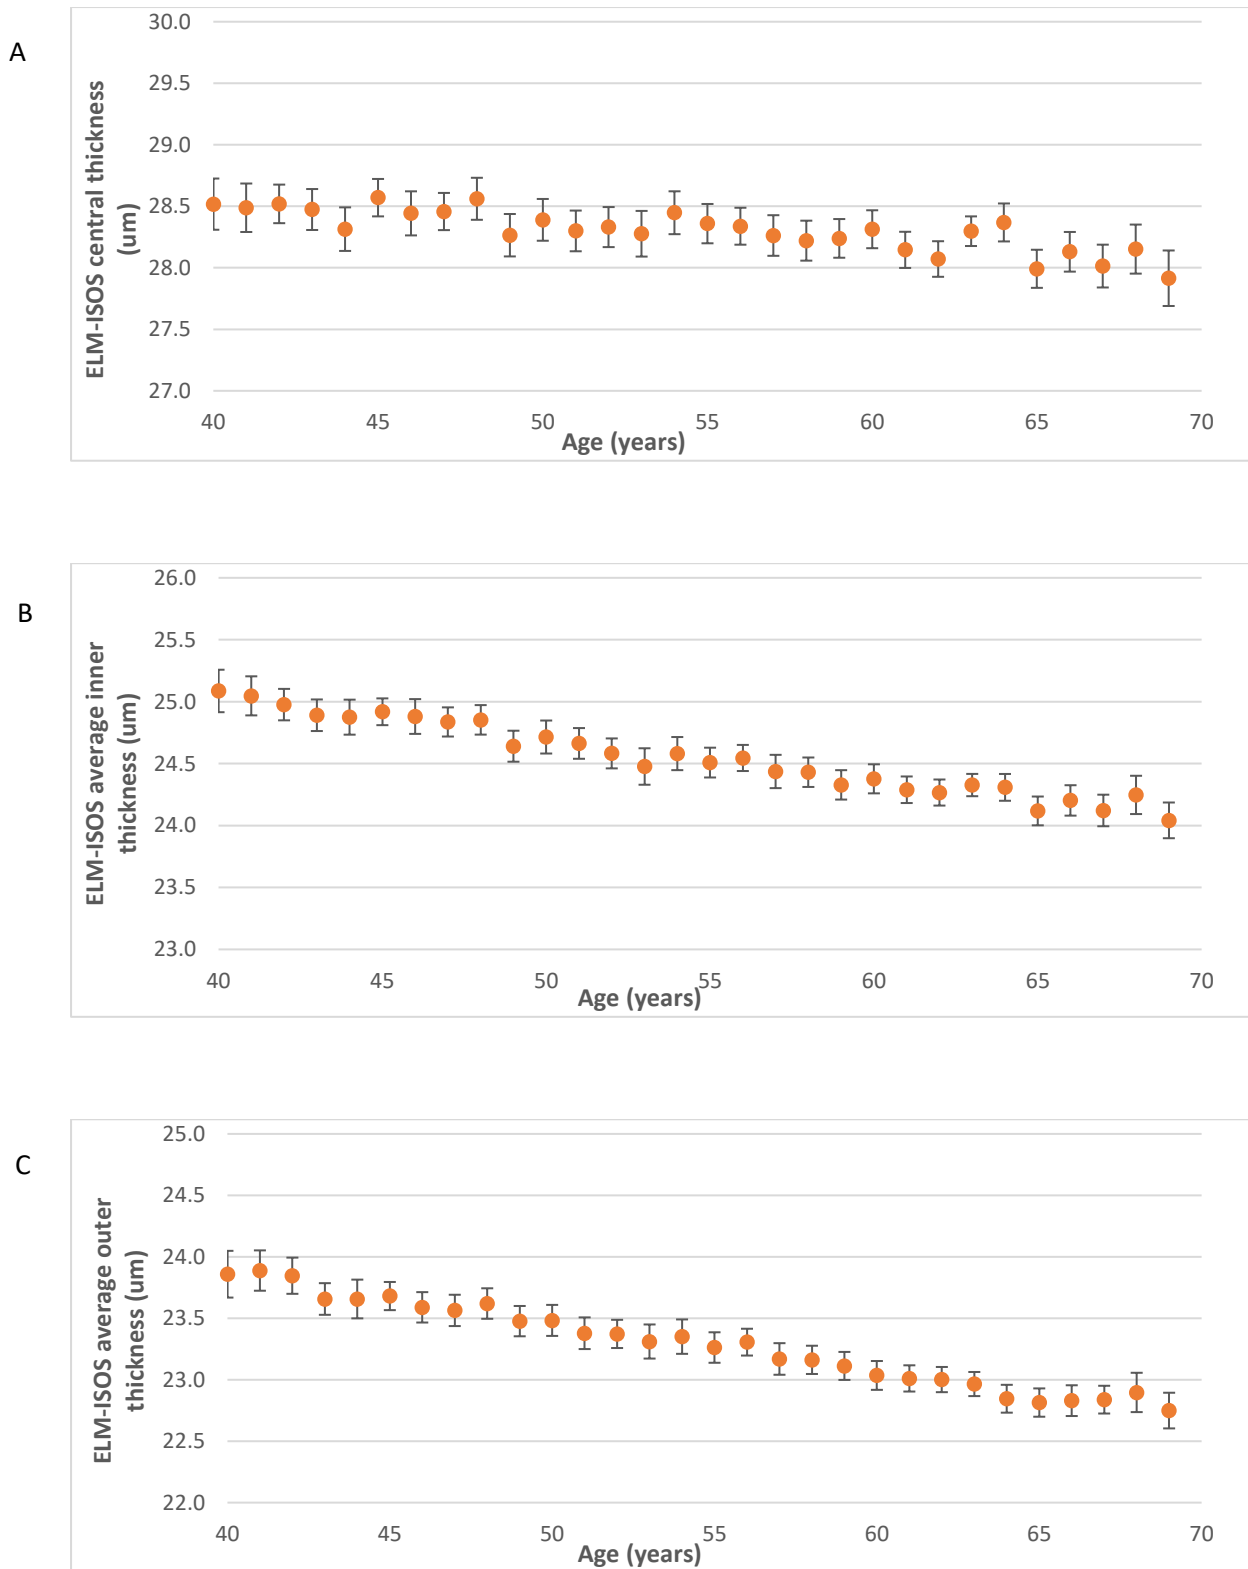

Figure S3. Graphs showing the mean External limiting membrane-Inner and outer segments (ELM-ISOS) thickness ( $\mu\text{m}$ ) in the (A) central, (B) average inner, and (C) average outer subfields by age. Error bars indicate 95% confidence interval.

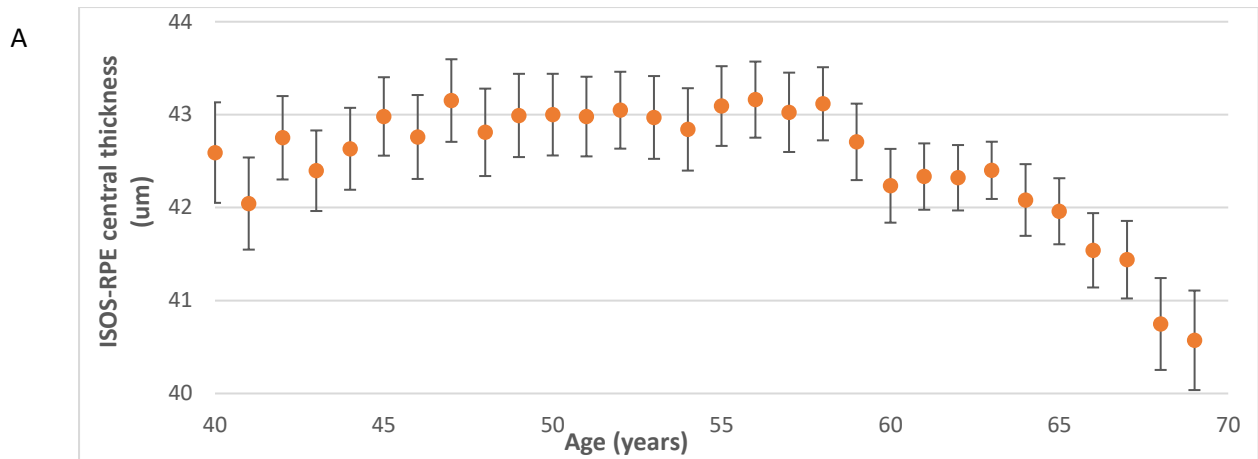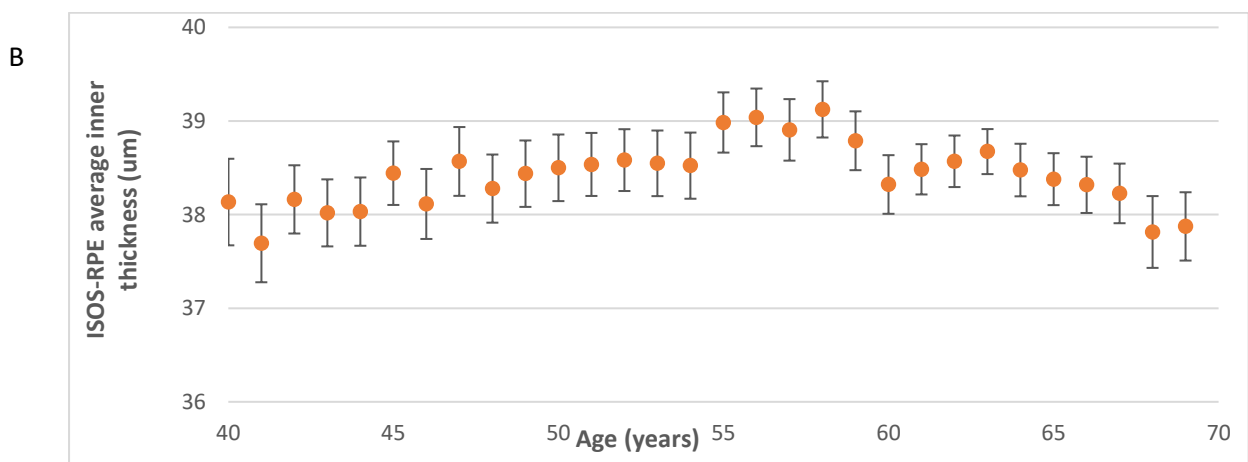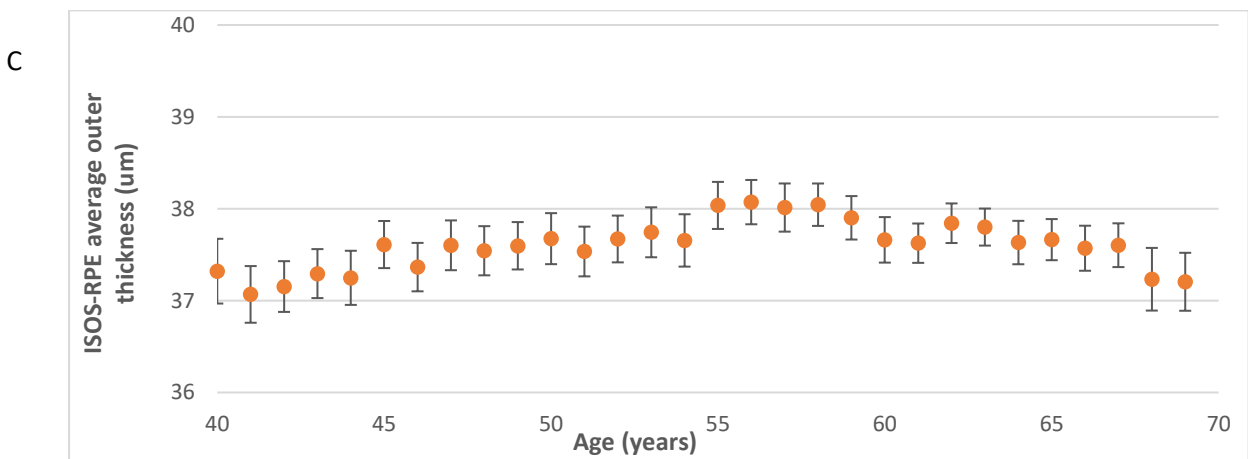

Figure S4. Graphs showing the mean Inner and outer segments-Retinal pigment epithelium thickness (ISOS-RPE) thickness ( $\mu\text{m}$ ) in the (A) central, (B) average inner, and (C) average outer subfields by age. Error bars indicate 95% confidence interval.

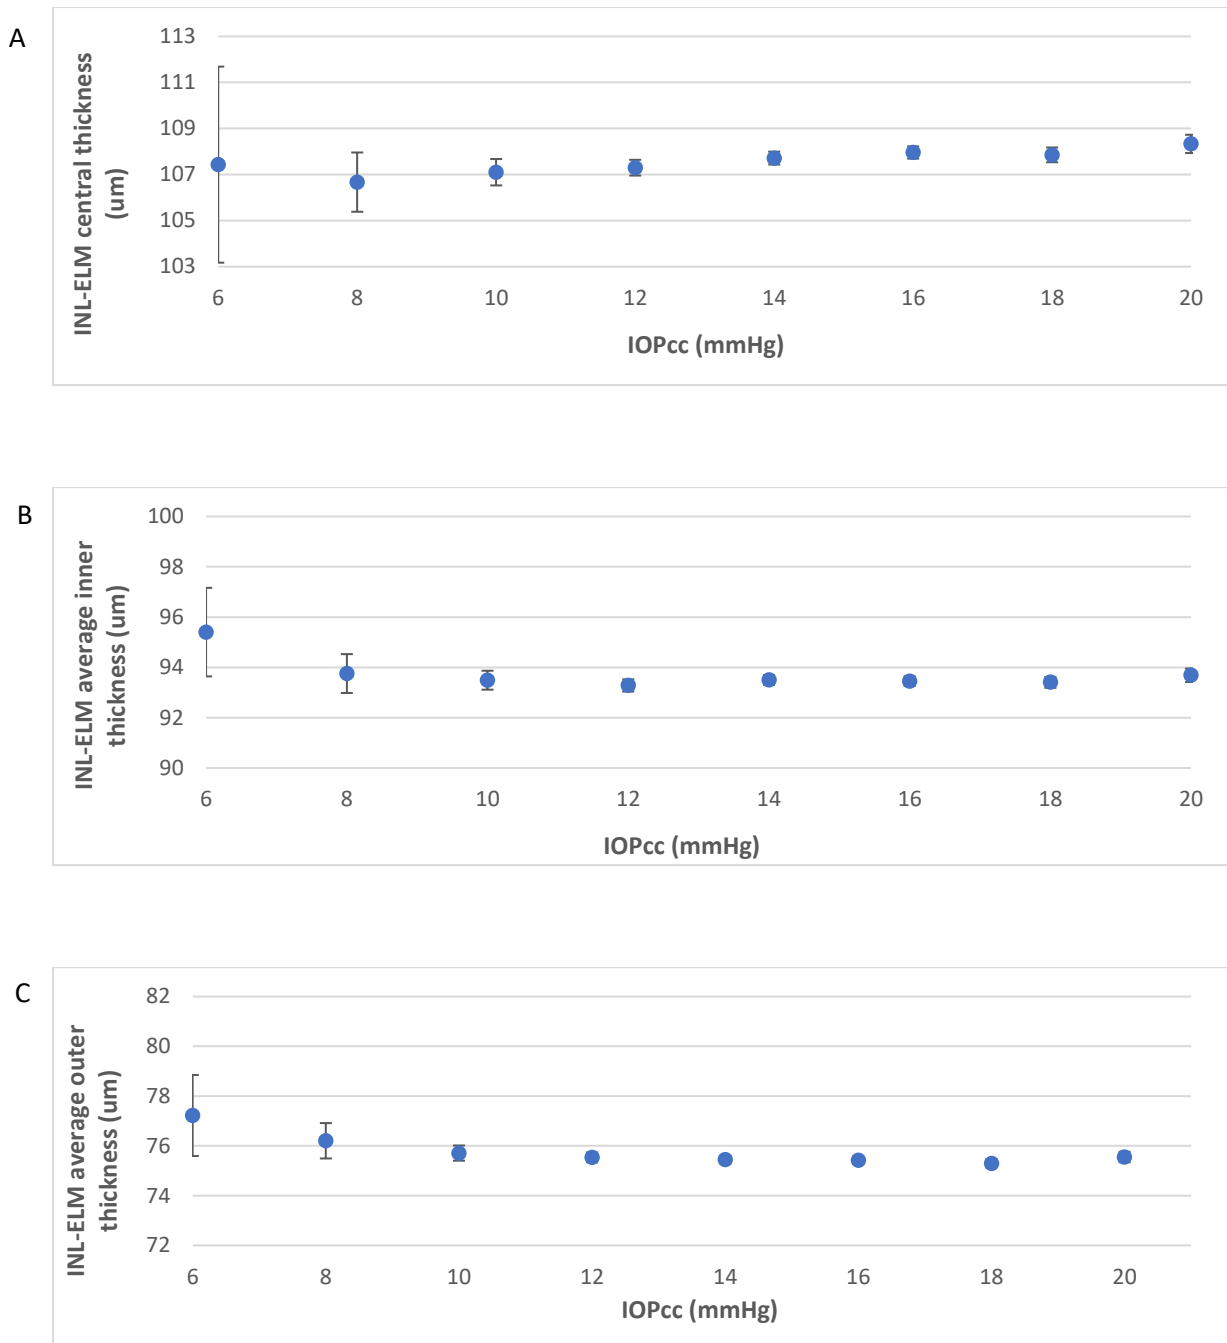

Figure S5. Graphs showing the mean Inner nuclear layer- External limiting membrane (INL-ELM) thickness ( $\mu\text{m}$ ) in the (A) central, (B) average inner, and (C) average outer subfields by IOP<sub>cc</sub> (mmHg). Error bars indicate 95% confidence interval.

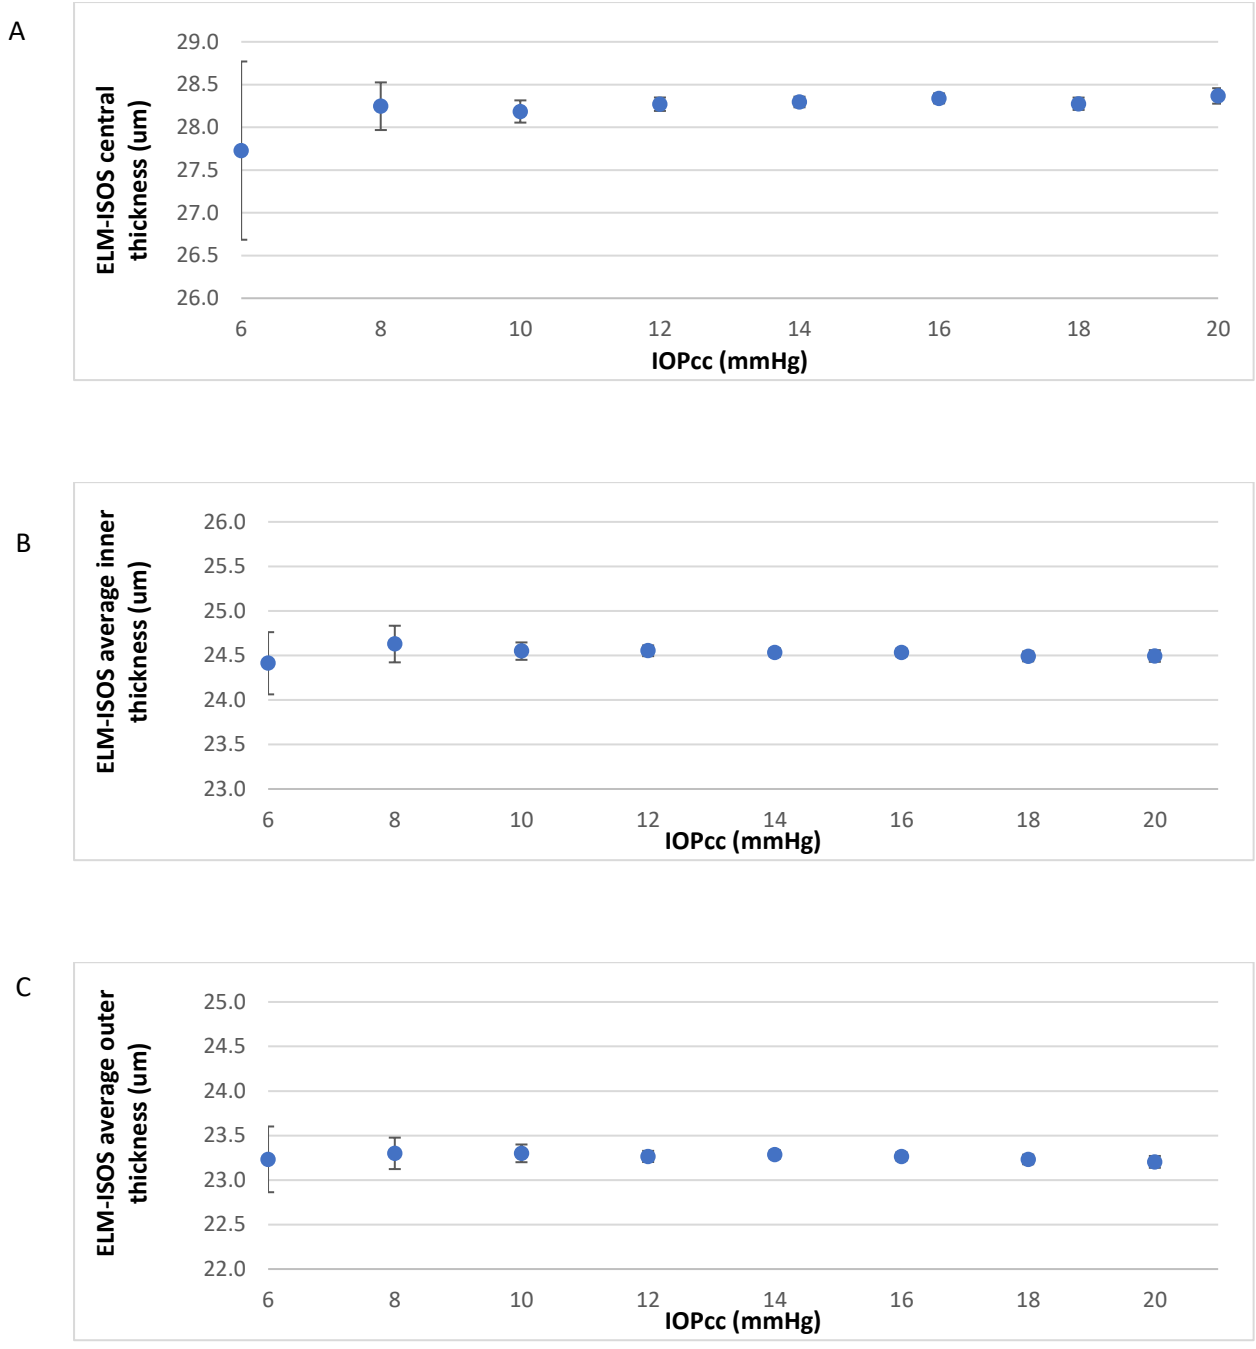

Figure S6. Graphs showing the mean External limiting membrane-Inner and outer segments (ELM-ISOS) thickness ( $\mu\text{m}$ ) in the (A) central, (B) average inner, and (C) average outer subfields by IOP<sub>cc</sub> (mmHg). Error bars indicate 95% confidence interval.

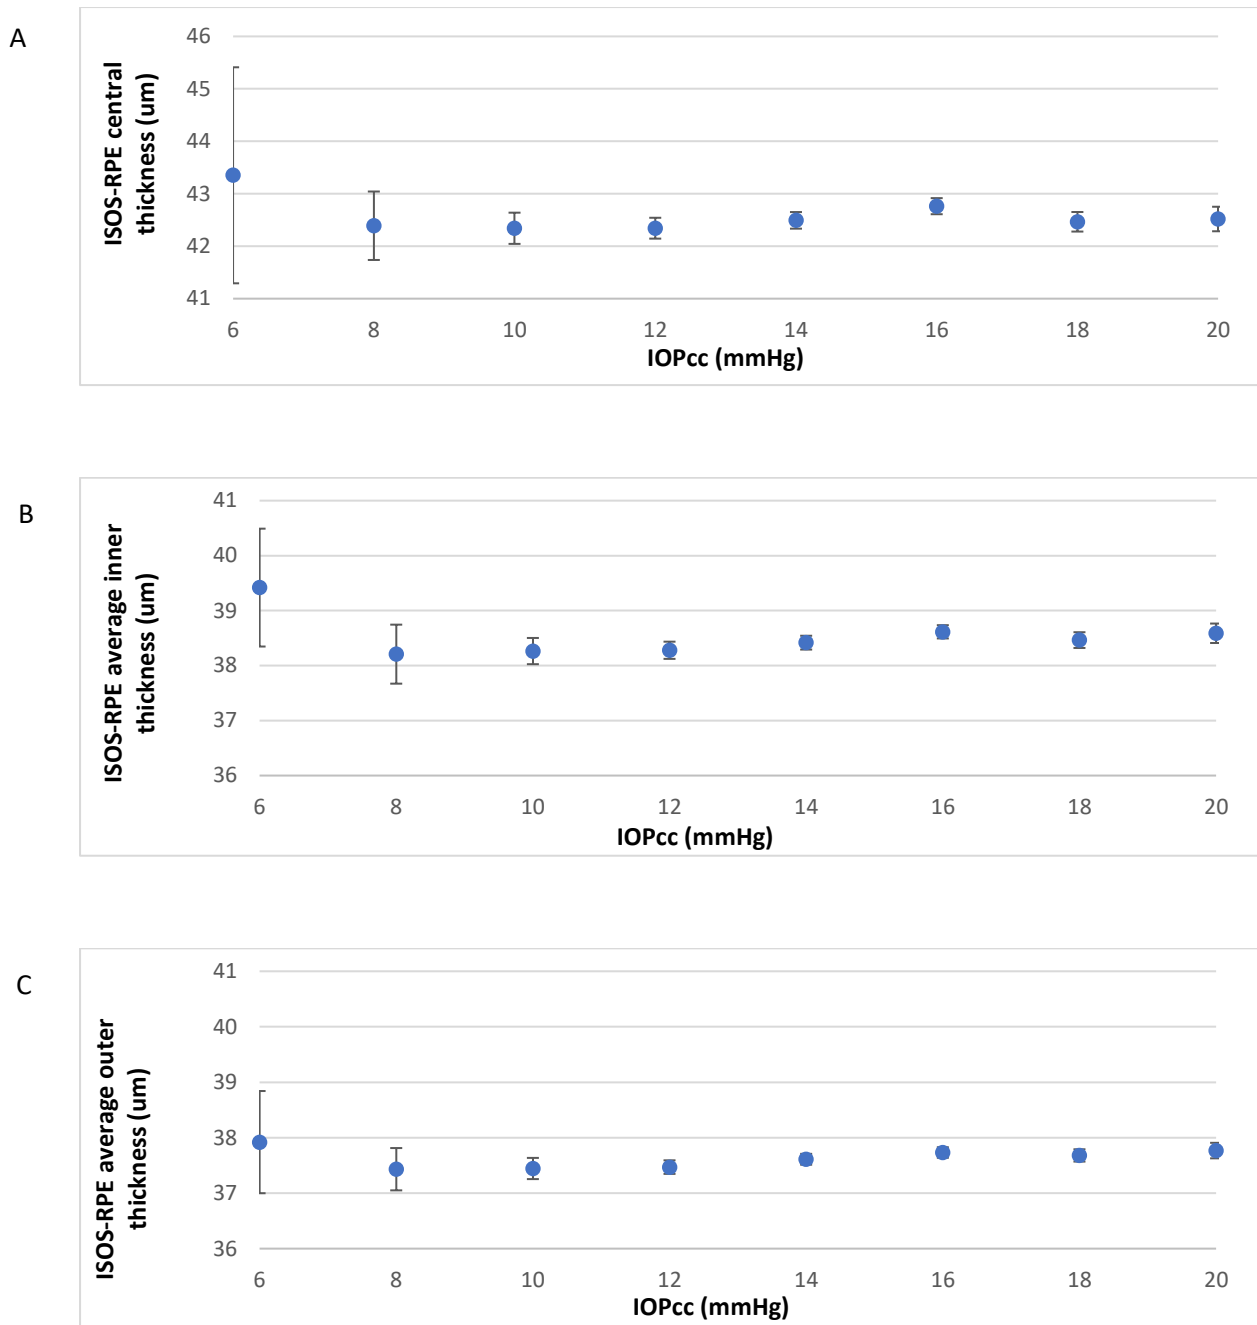

Figure S7. Graphs showing the mean Inner and outer segments-Retinal pigment epithelium thickness (ISOS-RPE) thickness ( $\mu\text{m}$ ) in the (A) central, (B) average inner, and (C) average outer subfields by IOP<sub>cc</sub> (mmHg). Error bars indicate 95% confidence interval



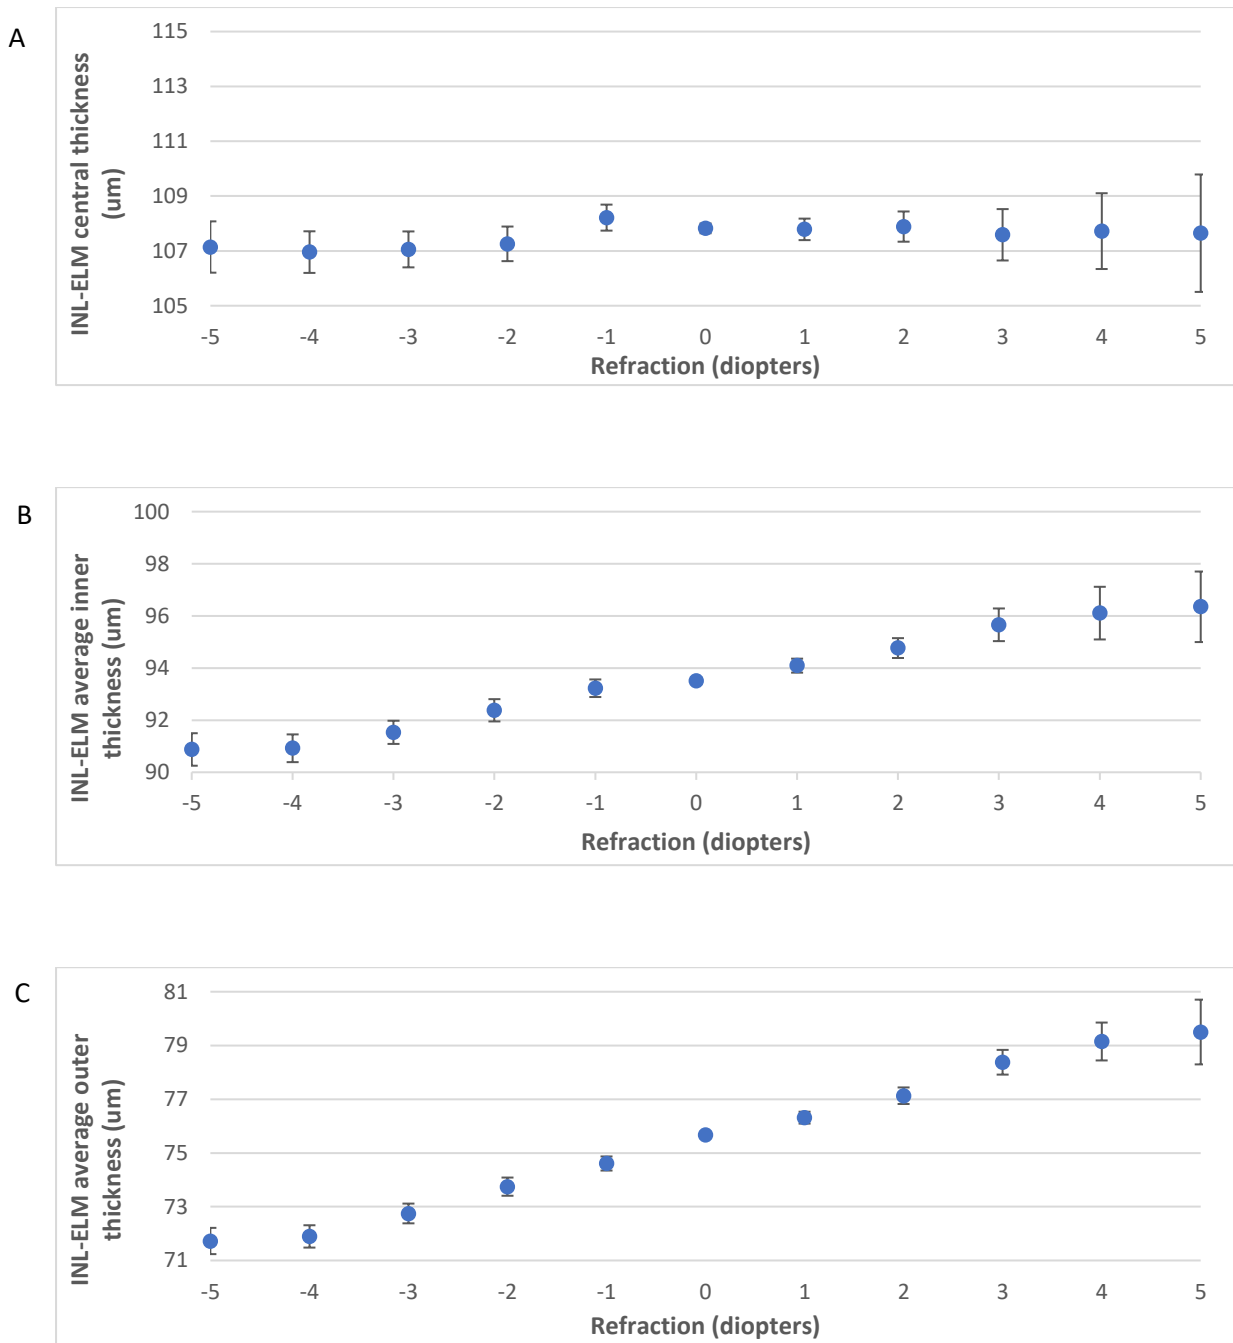

Figure S8. Graphs showing the mean Inner nuclear layer- External limiting membrane (INL-ELM) thickness ( $\mu\text{m}$ ) in the (A) central, (B) average inner, and (C) average outer subfields by refraction (D). Error bars indicate 95% confidence interval

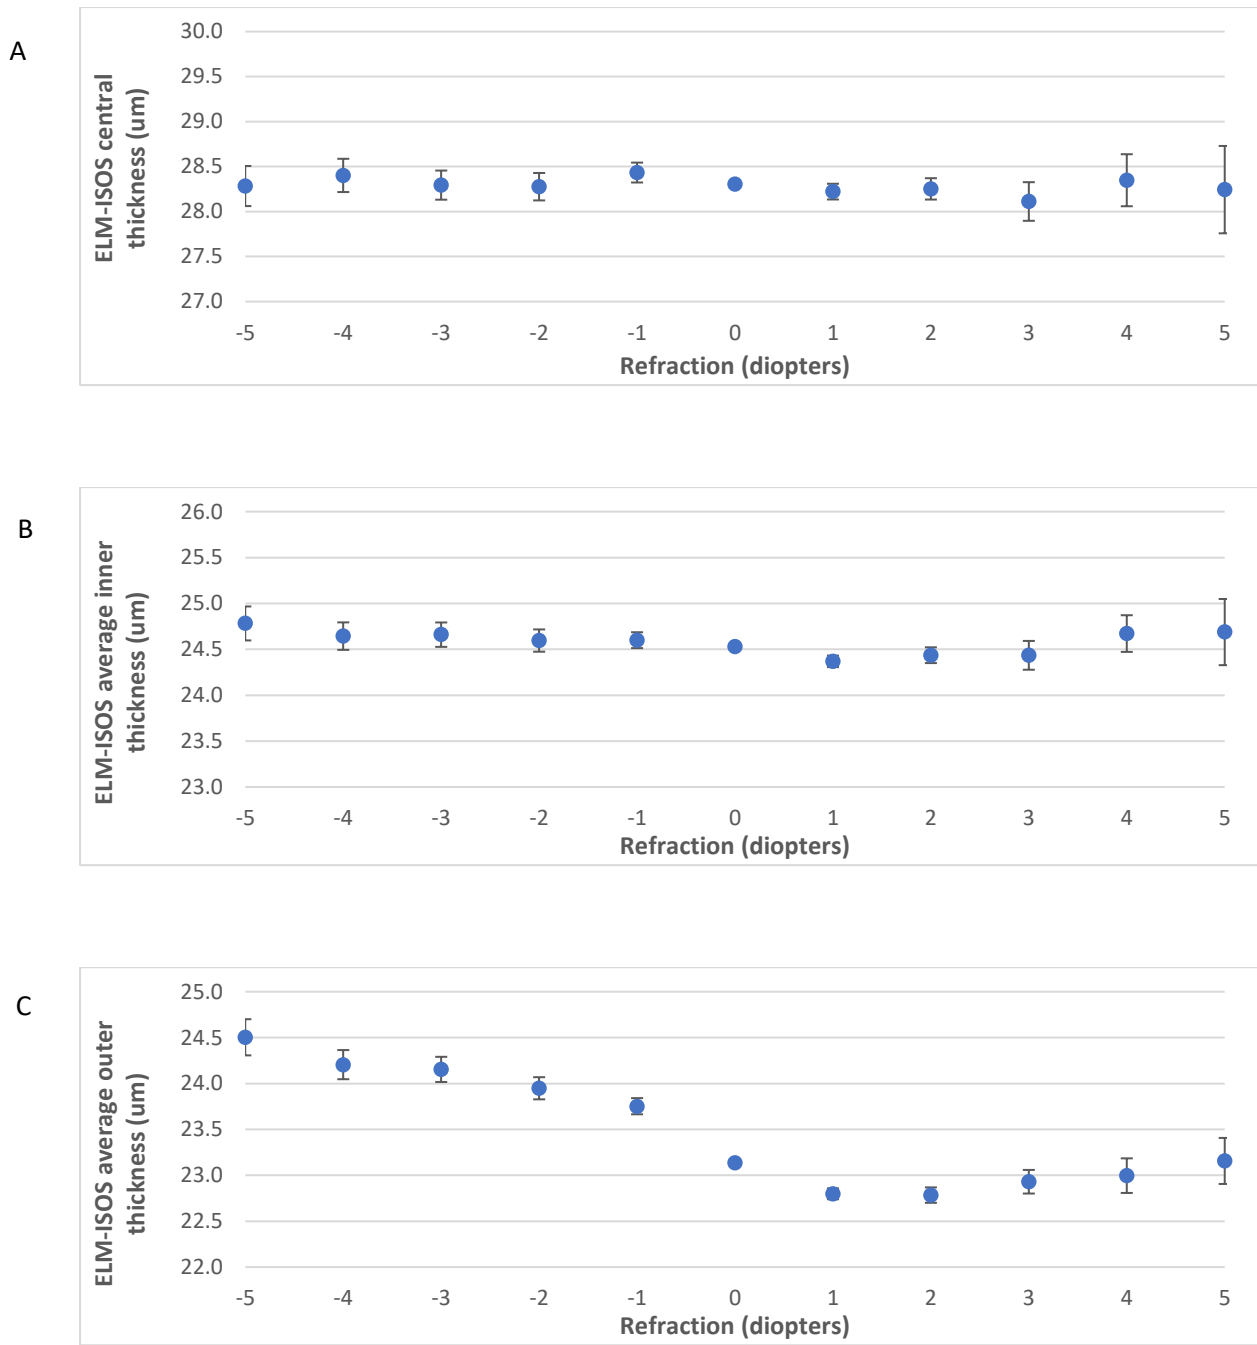

Figure S9. Graphs showing the mean External limiting membrane-Inner and outer segments (ELM-ISOS) thickness ( $\mu\text{m}$ ) in the (A) central, (B) average inner, and (C) average outer subfields by refraction (D). Error bars indicate 95% confidence interval

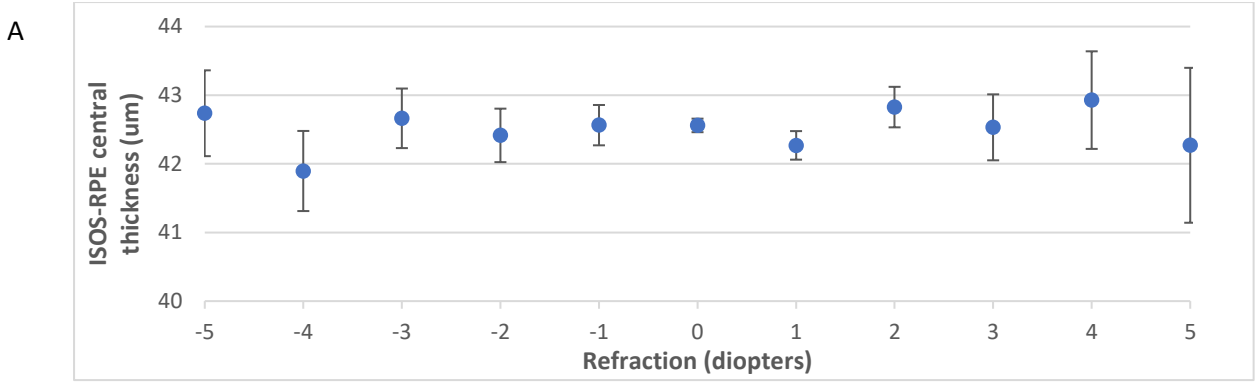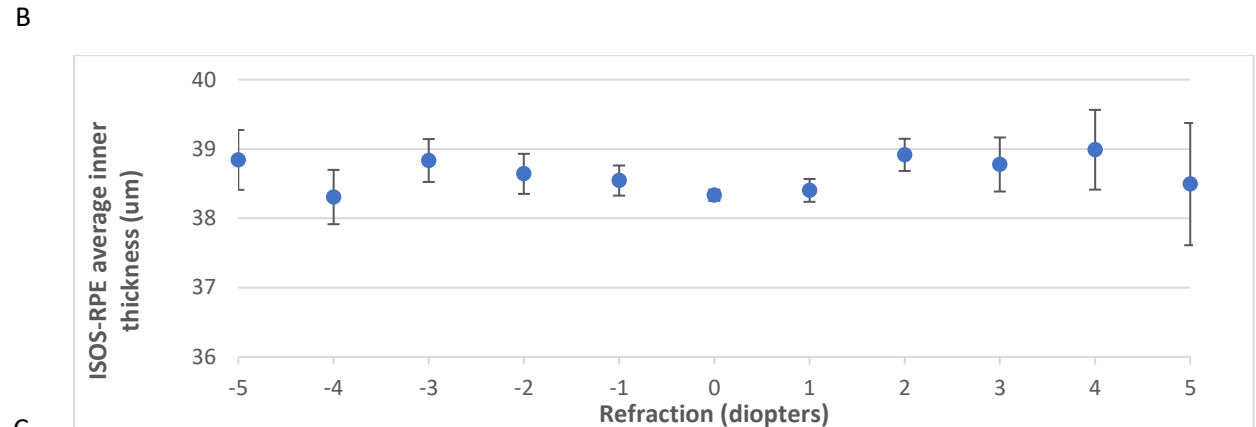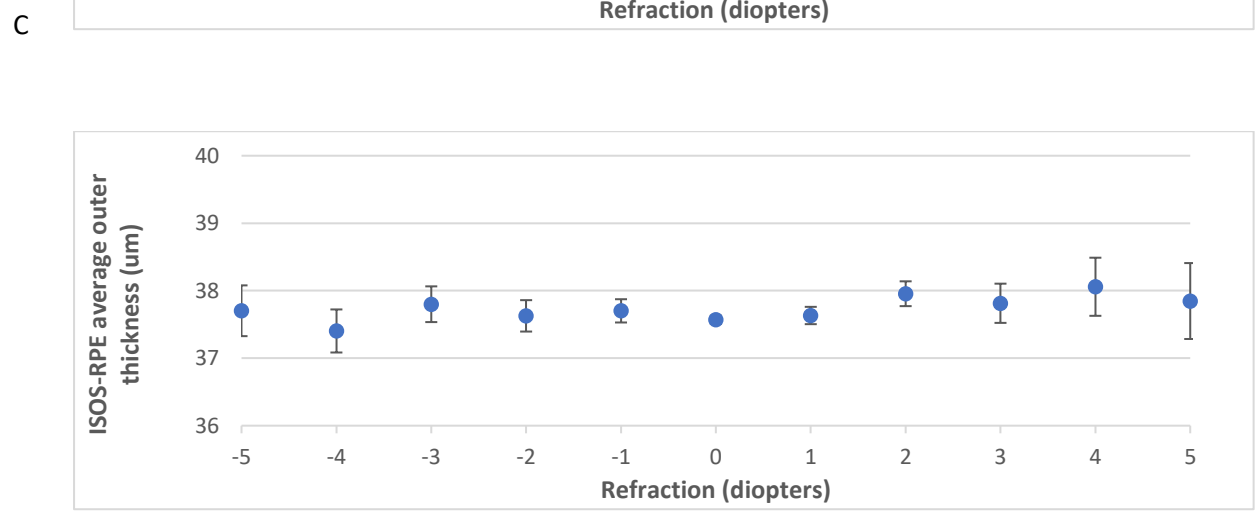

Figure S10. Graphs showing the mean Inner and outer segments-Retinal pigment epithelium thickness (ISOS-RPE) thickness ( $\mu\text{m}$ ) in the (A) central, (B) average inner, and (C) average outer subfields by refraction (D). Error bars indicate 95% confidence interval.

Table S1. Multivariate analysis of demographics and risk factors with the thickness of INL-ELM layer

|                          | Central subfield |          |                 |        | Average Inner Subfield |          |                |        | Average Outer Subfield |          |                |        | Total Average |          |                |        |
|--------------------------|------------------|----------|-----------------|--------|------------------------|----------|----------------|--------|------------------------|----------|----------------|--------|---------------|----------|----------------|--------|
|                          | $\beta$          | <i>B</i> | 95% CI          | P      | $\beta$                | <i>B</i> | 95% CI         | P      | $\beta$                | <i>B</i> | 95% CI         | P      | $\beta$       | <i>B</i> | 95% CI         | P      |
| Age                      | 0.03             | 0.05     | (0.03, 0.07)    | <0.001 | 0.003                  | 0.003    | (-0.009, 0.02) | 0.60   | -0.037                 | -0.03    | (-0.04, -0.02) | <0.001 | -0.024        | -0.02    | (-0.03, -0.01) | <0.001 |
| Sex                      |                  |          |                 |        |                        |          |                |        |                        |          |                |        |               |          |                |        |
| Male                     |                  | Ref      |                 |        |                        | Ref      |                |        |                        | Ref      |                |        |               | Ref      |                |        |
| Female                   |                  | -2.18    | (-2.58, -1.79)  | <0.001 |                        | -1.42    | (-1.70, -1.15) | <0.001 |                        | -1.39    | (-1.60, -1.17) | <0.001 |               | -1.43    | (-1.66, -1.21) | <0.001 |
| Race                     |                  |          |                 |        |                        |          |                |        |                        |          |                |        |               |          |                |        |
| White                    |                  | Ref      |                 |        |                        | Ref      |                |        |                        | Ref      |                |        |               | Ref      |                |        |
| Chinese                  |                  | -4.67    | (-7.02, -2.33)  | <0.001 |                        | -2.44    | (-4.05, -0.82) | 0.003  |                        | -1.23    | (-2.52, 0.06)  | 0.06   |               | -1.30    | (-2.64, 0.04)  | 0.06   |
| Asian                    |                  | -5.60    | (-6.49, -4.71)  | <0.001 |                        | -3.78    | (-4.39, -3.17) | <0.001 |                        | -2.60    | (-3.09, -2.11) | <0.001 |               | -2.97    | (-3.48, -2.47) | <0.001 |
| Black                    |                  | -7.38    | (-8.24, -6.52)  | <0.001 |                        | -4.26    | (-4.85, -3.66) | <0.001 |                        | -3.58    | (-4.05, -3.11) | <0.001 |               | -3.67    | (-4.15, -3.18) | <0.001 |
| Mixed/Others             |                  | -2.95    | (-3.87, -2.03)  | <0.001 |                        | -1.75    | (-2.39, -1.12) | <0.001 |                        | -1.44    | (-1.94, -0.93) | <0.001 |               | -1.55    | (-2.07, -1.02) | <0.001 |
| Smoking status           |                  |          |                 |        |                        |          |                |        |                        |          |                |        |               |          |                |        |
| Never                    |                  | Ref      |                 |        |                        | Ref      |                |        |                        | Ref      |                |        |               | Ref      |                |        |
| Previous                 |                  | 0.30     | (0.002, 0.59)   | 0.05   |                        | 0.16     | (-0.05, 0.36)  | 0.14   |                        | 0.05     | (-0.12, 0.21)  | 0.60   |               | 0.09     | (-0.08, 0.26)  | 0.28   |
| Current                  |                  | 0.12     | (-0.36, 0.60)   | 0.63   |                        | 0.13     | (-0.20, 0.46)  | 0.44   |                        | -0.05    | (-0.32, 0.21)  | 0.70   |               | -0.04    | (-0.31, 0.23)  | 0.78   |
| SBP (per 10mmHg)         | -0.12            | -0.08    | (-0.16, -0.004) | 0.04   | -0.07                  | -0.03    | (-0.08, 0.02)  | 0.25   | -0.11                  | -0.04    | (-0.08, 0.002) | 0.06   | -0.10         | -0.04    | (-0.08, 0.01)  | 0.09   |
| Refraction (per 1D)      | 0.005            | 0.04     | (-0.05, 0.13)   | 0.38   | 0.11                   | 0.60     | (0.54, 0.66)   | <0.001 | 0.20                   | 0.89     | (0.84, 0.94)   | <0.001 | 0.18          | 0.81     | (0.76, 0.86)   | <0.001 |
| IOP <sub>cc</sub> (mmHg) | 0.01             | 0.06     | (0.003, 0.11)   | 0.04   | 0.003                  | 0.009    | (-0.03, 0.05)  | 0.61   | -0.001                 | -0.003   | (-0.03, 0.03)  | 0.82   | 0.0001        | 0.0003   | (-0.03, 0.03)  | 0.99   |
| Corneal hysteresis       | -0.01            | -0.08    | (-0.16, -0.002) | 0.05   | 0.0004                 | 0.0002   | (-0.06, 0.06)  | 0.99   | 0.01                   | 0.03     | (-0.02, 0.07)  | 0.22   | 0.006         | 0.02     | (-0.02, 0.07)  | 0.34   |

Adjusted for age, gender, ethnicity, Townsend deprivation index, height, smoking status, systolic blood pressure, refraction, IOP<sub>cc</sub>, and corneal hysteresis  
 $\beta$  = standardised beta; *B*= unstandardised beta; P= P value; SBP= systolic blood pressure; IOP<sub>cc</sub>= Corneal-compensated intraocular pressure

Table S2. Multivariate analysis of demographics and risk factors with the thickness of ELM-ISOS layer

|                          | Central subfield |          |                |        | Average Inner Subfield |          |                 |        | Average Outer Subfield |          |                |        | Total Average |          |                |        |
|--------------------------|------------------|----------|----------------|--------|------------------------|----------|-----------------|--------|------------------------|----------|----------------|--------|---------------|----------|----------------|--------|
|                          | $\beta$          | <i>B</i> | 95% CI         | P      | $\beta$                | <i>B</i> | 95% CI          | P      | $\beta$                | <i>B</i> | 95% CI         | P      | $\beta$       | <i>B</i> | 95% CI         | P      |
| Age                      | -0.06            | -0.02    | (-0.02, -0.02) | <0.001 | -0.13                  | -0.03    | (-0.04, -0.03)  | <0.001 | -0.11                  | -0.03    | (-0.03, -0.03) | <0.001 | -0.13         | -0.03    | (-0.03, -0.03) | <0.001 |
| Sex                      |                  |          |                |        |                        |          |                 |        |                        |          |                |        |               |          |                |        |
| Male                     |                  | Ref      |                |        |                        | Ref      |                 |        |                        | Ref      |                |        |               | Ref      |                |        |
| Female                   |                  | -0.30    | (-0.39, -0.22) | <0.001 |                        | -0.30    | (-0.37, -0.23)  | <0.001 |                        | -0.23    | (-0.29, -0.16) | <0.001 |               | -0.25    | (-0.31, -0.18) | <0.001 |
| Race                     |                  |          |                |        |                        |          |                 |        |                        |          |                |        |               |          |                |        |
| White                    |                  | Ref      |                |        |                        | Ref      |                 |        |                        | Ref      |                |        |               | Ref      |                |        |
| Chinese                  |                  | -0.20    | (-0.73, 0.34)  | 0.47   |                        | 0.55     | (0.15, 0.95)    | 0.008  |                        | 0.64     | (0.24, 1.04)   | 0.002  |               | 0.62     | (0.25, 1.00)   | 0.001  |
| Asian                    |                  | -0.63    | (-0.83, -0.43) | <0.001 |                        | 0.02     | (-0.14, 0.17)   | 0.84   |                        | 0.06     | (-0.10, 0.21)  | 0.48   |               | 0.02     | (-0.13, 0.16)  | 0.84   |
| Black                    |                  | -1.08    | (-1.28, -0.89) | <0.001 |                        | -0.48    | (-0.62, -0.33)  | <0.001 |                        | -0.20    | (-0.35, -0.06) | 0.007  |               | -0.29    | (-0.42, -0.15) | <0.001 |
| Mixed/Others             |                  | -0.30    | (-0.51, -0.09) | 0.005  |                        | -0.16    | (-0.32, -0.002) | 0.05   |                        | -0.12    | (-0.28, 0.04)  | 0.14   |               | -0.13    | (-0.27, 0.02)  | 0.09   |
| Smoking status           |                  |          |                |        |                        |          |                 |        |                        |          |                |        |               |          |                |        |
| Never                    |                  | Ref      |                |        |                        | Ref      |                 |        |                        | Ref      |                |        |               | Ref      |                |        |
| Previous                 |                  | -0.03    | (-0.10, 0.03)  | 0.33   |                        | -0.02    | (-0.07, 0.03)   | 0.51   |                        | -0.02    | (-0.07, 0.03)  | 0.40   |               | -0.03    | (-0.07, 0.02)  | 0.29   |
| Current                  |                  | -0.23    | (-0.33, -0.12) | <0.001 |                        | -0.22    | (-0.30, -0.14)  | <0.001 |                        | -0.19    | (-0.27, -0.11) | <0.001 |               | -0.20    | (-0.27, -0.12) | <0.001 |
| SBP (per 10mmHg)         | -0.15            | -0.02    | (-0.04, -0.01) | 0.01   | -0.18                  | -0.02    | (-0.03, -0.01)  | 0.003  | -0.25                  | -0.03    | (-0.04, -0.01) | <0.001 | -0.26         | -0.03    | (-0.04, -0.01) | <0.001 |
| Refraction (per 1D)      | 0.003            | 0.005    | (-0.01, 0.03)  | 0.60   | 0.002                  | 0.003    | (-0.01, 0.02)   | 0.66   | -0.15                  | -0.21    | (-0.22, -0.19) | <0.001 | -0.12         | -0.15    | (-0.17, -0.14) | <0.001 |
| IOP <sub>cc</sub> (mmHg) | 0.01             | 0.01     | (0.001, 0.03)  | 0.03   | 0.002                  | 0.001    | (-0.007, 0.01)  | 0.75   | 0.001                  | 0.001    | (-0.008, 0.01) | 0.85   | 0.002         | 0.001    | (-0.007, 0.01) | 0.77   |
| Corneal hysteresis       | -0.01            | -0.02    | (-0.03, 0.003) | 0.10   | -0.006                 | -0.006   | (-0.02, 0.007)  | 0.37   | 0.011                  | 0.01     | (-0.001, 0.03) | 0.08   | 0.007         | 0.007    | (-0.006, 0.02) | 0.29   |

Adjusted for age, gender, ethnicity, Townsend deprivation index, height, smoking status, systolic blood pressure, refraction, IOP<sub>cc</sub>, and corneal hysteresis  
 $\beta$  = standardised beta; *B*= unstandardised beta; P= P value; SBP= systolic blood pressure; IOP<sub>cc</sub>= Corneal-compensated intraocular pressure

Table S3. Multivariate analysis of demographics and risk factors with the thickness of ISOS-RPE layer

|                          | Central subfield |          |                |        | Average Inner Subfield |          |                |        | Average Outer Subfield |          |                |        | Total Average |          |                 |        |
|--------------------------|------------------|----------|----------------|--------|------------------------|----------|----------------|--------|------------------------|----------|----------------|--------|---------------|----------|-----------------|--------|
|                          | $\beta$          | <i>B</i> | 95% CI         | P      | $\beta$                | <i>B</i> | 95% CI         | P      | $\beta$                | <i>B</i> | 95% CI         | P      | $\beta$       | <i>B</i> | 95% CI          | P      |
| Age                      | -0.06            | -0.05    | (-0.07, -0.04) | <0.001 | 0.003                  | 0.002    | (-0.006, 0.01) | 0.62   | 0.01                   | 0.006    | (-0.001, 0.01) | 0.09   | 0.006         | 0.003    | (-0.004, 0.01)  | 0.36   |
| Sex                      |                  |          |                |        |                        |          |                |        |                        |          |                |        |               |          |                 |        |
| Male                     |                  | Ref      |                |        |                        | Ref      |                |        |                        | Ref      |                |        |               | Ref      |                 |        |
| Female                   |                  | 0.54     | (0.31, 0.77)   | <0.001 |                        | 0.04     | (-0.14, 0.22)  | 0.64   |                        | -0.02    | (-0.16, 0.12)  | 0.75   |               | -0.006   | (-0.15, 0.14)   | 0.94   |
| Race                     |                  |          |                |        |                        |          |                |        |                        |          |                |        |               |          |                 |        |
| White                    |                  | Ref      |                |        |                        | Ref      |                |        |                        | Ref      |                |        |               | Ref      |                 |        |
| Chinese                  |                  | 0.97     | (-0.39, 2.32)  | 0.16   |                        | 0.81     | (-0.26, 1.87)  | 0.14   |                        | 0.17     | (-0.66, 1.01)  | 0.69   |               | 0.40     | (-0.47, 1.27)   | 0.37   |
| Asian                    |                  | 0.36     | (-0.15, 0.88)  | 0.17   |                        | 0.27     | (-0.13, 0.67)  | 0.19   |                        | -0.15    | (-0.47, 0.16)  | 0.33   |               | -0.05    | (-0.38, 0.28)   | 0.76   |
| Black                    |                  | -2.97    | (-3.47, -2.48) | <0.001 |                        | -3.03    | (-3.42, -2.64) | <0.001 |                        | -2.43    | (-2.73, -2.12) | <0.001 |               | -2.55    | (-2.87, -2.23)  | <0.001 |
| Mixed/Others             |                  | -1.04    | (-1.57, -0.51) | <0.001 |                        | -1.07    | (-1.48, -0.65) | <0.001 |                        | -0.92    | (-1.24, -0.59) | <0.001 |               | -0.93    | (-1.27, -0.59)  | <0.001 |
| Smoking status           |                  |          |                |        |                        |          |                |        |                        |          |                |        |               |          |                 |        |
| Never                    |                  | Ref      |                |        |                        | Ref      |                |        |                        | Ref      |                |        |               | Ref      |                 |        |
| Previous                 |                  | 0.32     | (0.15, 0.49)   | <0.001 |                        | 0.17     | (0.03, 0.30)   | 0.02   |                        | 0.06     | (-0.05, 0.16)  | 0.27   |               | 0.09     | (-0.02, 0.20)   | 0.103  |
| Current                  |                  | 0.03     | (-0.25, 0.30)  | 0.85   |                        | -0.17    | (-0.39, 0.04)  | 0.12   |                        | -0.35    | (-0.52, -0.18) | <0.001 |               | -0.31    | (-0.48, -0.13)  | 0.001  |
| SBP (per 10mmHg)         | -0.11            | -0.04    | (-0.08, 0.005) | 0.08   | -0.04                  | -0.01    | (-0.05, 0.02)  | 0.53   | -0.14                  | -0.03    | (-0.06, -0.01) | 0.02   | -0.12         | -0.03    | (-0.06, 0.0003) | 0.052  |
| Refraction (per 1D)      | 0.02             | 0.08     | (0.03, 0.13)   | 0.002  | 0.001                  | 0.004    | (-0.04, 0.04)  | 0.83   | 0.01                   | 0.03     | (0.0004, 0.06) | 0.05   | 0.01          | 0.03     | (-0.003, 0.06)  | 0.079  |
| IOP <sub>cc</sub> (mmHg) | 0.03             | 0.07     | (0.04, 0.10)   | <0.001 | 0.02                   | 0.05     | (0.02, 0.07)   | <0.001 | 0.03                   | 0.04     | (0.02, 0.06)   | <0.001 | 0.03          | 0.04     | (0.02, 0.06)    | <0.001 |
| Corneal hysteresis       | 0.02             | 0.07     | (0.02, 0.12)   | 0.004  | 0.02                   | 0.06     | (0.02, 0.10)   | 0.001  | 0.02                   | 0.04     | (0.009, 0.07)  | 0.01   | 0.02          | 0.04     | (0.01, 0.07)    | 0.005  |

Adjusted for age, gender, ethnicity, Townsend deprivation index, height, smoking status, systolic blood pressure, refraction, IOP<sub>cc</sub>, and corneal hysteresis  
 $\beta$  = standardised beta; *B*= unstandardised beta; P= P value; SBP= systolic blood pressure; IOP<sub>cc</sub>= Corneal-compensated intraocular pressure
